# Supplementary material
Source: MDPI journal article supplement (https://www.mdpi.com/2077-0472/11/8/730)
Supplement: s1 [file s1]

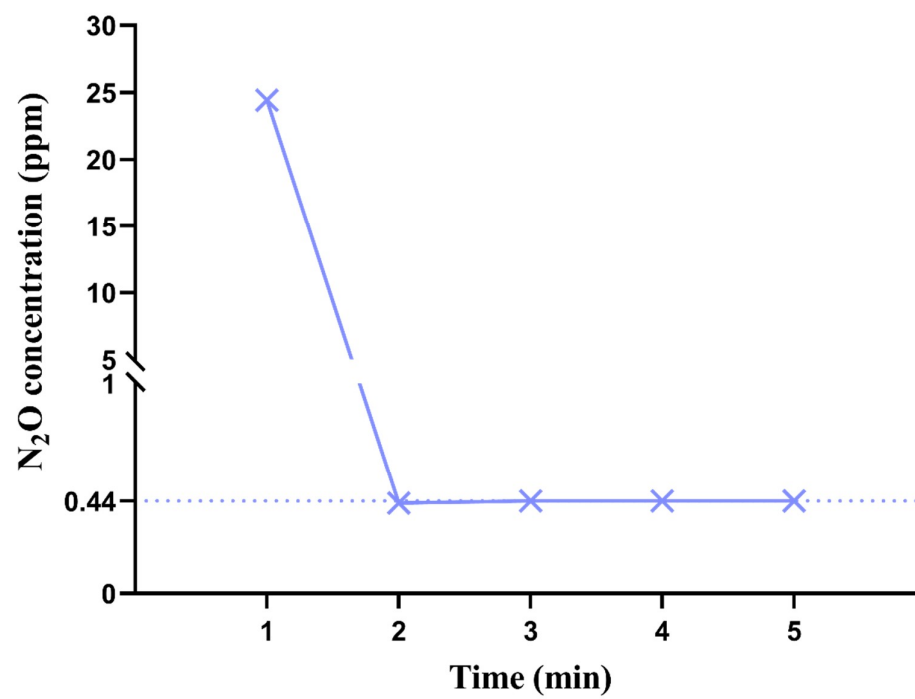

**Figure S1.** The change in N<sub>2</sub>O concentration after all bottles were opened and placed in a fuming cupboard for 5 minutes. The N<sub>2</sub>O concentration at 1 min indicated the initial concentration.

**Table S1.** Primers and the thermal cycling conditions of functional genes related to N<sub>2</sub>O.

| Gene            | Name               | Sequence              | Thermal profile                                          | Reference                   |
|-----------------|--------------------|-----------------------|----------------------------------------------------------|-----------------------------|
| AOA <i>amoA</i> | CrenamoA23f        | ATGGTCTGGCTWAGACG     | 15 s-95°C, 53°C-45 s, 72°C-45 s,<br>83°C-15 s, 45 cycles | Nicol and Schleper,<br>2006 |
|                 | CrenamoA616r       | GCCATCCATCTGTATGTCCA  |                                                          |                             |
| AOB <i>amoA</i> | <i>amoA</i> -1F    | GGGGTTTCTACTGGTGGT    | 15 s-95°C, 54°C-40 s, 72°C-45 s,                         | Rotthauwe et al., 1997      |
|                 | <i>amoA</i> -2R    | CCCCTCKGSAAAGCCTTCTTC | 84°C-15 s, 45 cycles                                     |                             |
| <i>nirK</i>     | <i>nirK</i> -F1aCu | ATCATGGTSCTGCCGCG     | 10 s-95°C, 53°C-45 s, 72°C-45 s,                         | Henry et al., 2004          |
|                 | <i>nirK</i> -R3Cu  | GCCTCGATCAGRTTGTGGTT  | 86°C-15 s, 45 cycles                                     |                             |
| <i>nirS</i>     | <i>nirS</i> -Cd3aF | GTSAACG TSAAGGARACSGG | 15 s-95°C, 50°C-45 s, 72°C-45 s,                         | Throbäck et al., 2004       |
|                 | <i>nirS</i> -R3cd  | GASTTCGGRTGSGTCTTGA   | 88°C-15 s, 50 cycles                                     |                             |
| <i>nosZ</i>     | <i>nosZ</i> -F     | CGYTGTTCMTCGACAGCCAG  | 15 s-95°C, 50°C-30 s, 72°C-30 s,<br>83°C-15 s, 55 cycles | Scala and Kerkhof,<br>1998  |
|                 | <i>nosZ</i> -1662R | CGSACCTTSTTGCCSTYGCG  |                                                          |                             |

**References**

- Henry, S., Baudoin, E., López-Gutiérrez, J.C., Martin-Laurent, F., Brauman, A., Philippot, L., 2004. Quantification of denitrifying bacteria in soils by nirK gene targeted real-time PCR. *Journal of Microbiological Methods* 59, 327–335. <https://doi.org/10.1016/j.mimet.2004.07.002>
- Nicol, G.W., Schleper, C., 2006. Ammonia-oxidising Crenarchaeota: important players in the nitrogen cycle? *Trends in Microbiology* 14, 207–212. <https://doi.org/10.1016/j.tim.2006.03.004>
- Rotthauwe, J.H., Witzel, K.P., Liesack, W., 1997. The ammonia monooxygenase structural gene amoA as a functional marker: molecular fine-scale analysis of natural ammonia-oxidizing populations. *Applied and environmental microbiology* 63, 4704–4712. <https://doi.org/10.1128/AEM.63.12.4704-4712.1997>
- Scala, D.J., Kerkhof, L.J., 1998. Nitrous oxide reductase ( *nosZ* ) gene-specific PCR primers for detection of denitrifiers and three *nosZ* genes from marine sediments. *FEMS Microbiology Letters* 162, 61–68. <https://doi.org/10.1111/j.1574-6968.1998.tb12979.x>
- Throbäck, I.N., Enwall, K., Jarvis, Å., Hallin, S., 2004. Reassessing PCR primers targeting nirS, nirK and nosZ genes for community surveys of denitrifying bacteria with DGGE. *FEMS Microbiology Ecology* 49, 401–417. <https://doi.org/10.1016/j.femsec.2004.04.011>
